# Supplementary material for: Energy Metabolism in Human Pluripotent Stem Cells and Their Differentiated Counterparts
Source: PubMed Central journal article supplement (PMC3117868; doi:10.1371/journal.pone.0020914), 2011-06-17
Supplement: pone.0020914.s002.pdf [file pone.0020914.s002.pdf]

| Genes | p values |          |               |          |          |
|-------|----------|----------|---------------|----------|----------|
|       | WA01     | AE iPS   | IMR-90<br>iPS | H7TF     | IMR-90   |
| ACLY  | 0.107296 | 0.234368 | 0.061387      | 0.393416 | 0.246977 |
| ACO1  | 0.399131 | 0.079385 | 0.17169       | 0.083256 | 0.001386 |
| ACO2  | 0.211968 | 0.089029 | 0.006734      | 0.15926  | 0.006435 |
| AGL   | 0.716072 | 0.005425 | 0.192293      | 0.003653 | 0.000895 |
| ALDOA | 0.193238 | 0.116809 | 0.00108       | 0.086865 | 0.00002  |
| ALDOB | 0.606445 | 0.046384 | 0.011521      | 0.331536 | 0.339268 |
| ALDOC | 0.106059 | 0.07849  | 0.003951      | 0.108363 | 0.652673 |
| BPGM  | 0.419129 | 0.088599 | 0.032134      | 0.154385 | 0.139919 |
| CS    | 0.598438 | 0.052026 | 0.45459       | 0.548219 | 0.003514 |
| DLAT  | 0.23882  | 0.369543 | 0.531728      | 0.001807 | 0.000145 |
| DLD   | 0.860033 | 0.027963 | 0.493081      | 0.671359 | 0.004943 |
| DLST  | 0.628177 | 0.019154 | 0.018305      | 0.726826 | 0.036226 |
| ENO1  | 0.143852 | 0.219918 | 0.859918      | 0.014508 | 0.040667 |
| ENO2  | 0.11791  | 0.075848 | 0.556327      | 0.089909 | 0.627736 |
| ENO3  | 0.186648 | 0.012241 | 0.180077      | 0.006147 | 0.003549 |
| FBP1  | 0.126317 | 0.914908 | 0.010103      | 0.066292 | 0.064231 |
| FBP2  | 0.114863 | 0.003239 | 0.006201      | 0.681758 | 0.001413 |
| FH    | 0.189939 | 0.945714 | 0.123065      | 0.242483 | 0.105099 |
| G6PC  | 0.606445 | 0.046384 | 0.011521      | 0.331536 | 0.339268 |
| G6PC3 | 0.164792 | 0.949088 | 0.208358      | 0.531407 | 0.277338 |
| G6PD  | 0.222918 | 0.12939  | 0.009571      | 0.000621 | 0.000546 |
| GALM  | 0.271864 | 0.216248 | 0.607923      | 0.644125 | 0.008806 |
| GBE1  | 0.175241 | 0.182796 | 0.401636      | 0.059971 | 0.003255 |
| GCK   | 0.606445 | 0.046384 | 0.011521      | 0.331536 | 0.339268 |
| GPI   | 0.293344 | 0.102082 | 0.084181      | 0.112545 | 0.028433 |
| GSK3A | 0.119705 | 0.144921 | 0.083618      | 0.408039 | 0.061973 |
| GSK3B | 0.434825 | 0.208689 | 0.086282      | 0.844473 | 0.094813 |
| GYS1  | 0.560387 | 0.305042 | 0.073519      | 0.361399 | 0.006032 |
| GYS2  | 0.606445 | 0.046384 | 0.011521      | 0.331536 | 0.339268 |
| H6PD  | 0.536777 | 0.772588 | 0.001435      | 0.022755 | 0.005125 |
| HK2   | 0.113544 | 0.67292  | 0.033784      | 0.292525 | 0.951775 |
| HK3   | 0.606445 | 0.046384 | 0.011521      | 0.331536 | 0.339268 |
| IDH1  | 0.112953 | 0.38673  | 0.274658      | 0.0133   | 0.009346 |
| IDH2  | 0.109272 | 0.7786   | 0.031926      | 0.983299 | 0.759598 |
| IDH3A | 0.291665 | 0.144282 | 0.699497      | 0.35153  | 0.107709 |
| IDH3B | 0.126595 | 0.753791 | 0.063038      | 0.271417 | 0.002515 |
| IDH3G | 0.127383 | 0.888987 | 0.020491      | 0.160844 | 0.22335  |

|                |          |          |          |          |          |
|----------------|----------|----------|----------|----------|----------|
| <b>MDH1</b>    | 0.136175 | 0.888013 | 0.220693 | 0.24667  | 0.032701 |
| <b>MDH1B</b>   | 0.162897 | 0.520214 | 0.113153 | 0.126206 | 0.019708 |
| <b>MDH2</b>    | 0.741719 | 0.076133 | 0.030813 | 0.960944 | 0.012102 |
| <b>OGDH</b>    | 0.20949  | 0.383583 | 0.033559 | 0.773533 | 0.003039 |
| <b>PC</b>      | 0.10867  | 0.486329 | 0.070307 | 0.698611 | 0.144088 |
| <b>PCK1</b>    | 0.606445 | 0.046384 | 0.011521 | 0.331536 | 0.339268 |
| <b>PCK2</b>    | 0.10813  | 0.884791 | 0.082829 | 0.167213 | 0.250898 |
| <b>PDHA1</b>   | 0.770854 | 0.041691 | 0.395379 | 0.045818 | 0.00137  |
| <b>PDHB</b>    | 0.529193 | 0.012731 | 0.486834 | 0.018482 | 0.000693 |
| <b>PDK1</b>    | 0.125991 | 0.108717 | 0.306787 | 0.106219 | 0.317454 |
| <b>PDK2</b>    | 0.136513 | 0.180319 | 0.736911 | 0.114486 | 0.274814 |
| <b>PDK3</b>    | 0.168418 | 0.065322 | 0.033078 | 0.14104  | 0.008899 |
| <b>PDK4</b>    | 0.809515 | 0.01443  | 0.012961 | 0.436308 | 0.305641 |
| <b>PDP2</b>    | 0.128547 | 0.403003 | 0.720828 | 0.015999 | 0.008756 |
| <b>PDPR</b>    | 0.205352 | 0.658809 | 0.959175 | 0.095329 | 0.064798 |
| <b>PFKL</b>    | 0.249233 | 0.313119 | 0.224002 | 0.346346 | 0.052093 |
| <b>PGAM2</b>   | 0.525487 | 0.744314 | 0.893737 | 0.031701 | 0.055437 |
| <b>PGK1</b>    | 0.522596 | 0.075003 | 0.045169 | 0.125637 | 0.0107   |
| <b>PGK2</b>    | 0.606445 | 0.046384 | 0.011521 | 0.331536 | 0.339268 |
| <b>PGLS</b>    | 0.854679 | 0.021219 | 0.088223 | 0.276943 | 0.975412 |
| <b>PGM1</b>    | 0.118692 | 0.108458 | 0.557582 | 0.443997 | 0.255193 |
| <b>PGM2</b>    | 0.314817 | 0.234121 | 0.248629 | 0.699586 | 0.002456 |
| <b>PGM3</b>    | 0.219734 | 0.069024 | 0.263436 | 0.527696 | 0.591157 |
| <b>PHKA1</b>   | 0.117699 | 0.046949 | 0.322249 | 0.283362 | 0.011132 |
| <b>PHKB</b>    | 0.759246 | 0.227841 | 0.905398 | 0.490711 | 0.052339 |
| <b>PHKG1</b>   | 0.857115 | 0.004105 | 0.098563 | 0.538787 | 0.712081 |
| <b>PHKG2</b>   | 0.184464 | 0.330626 | 0.305181 | 0.085937 | 0.09916  |
| <b>PKLR</b>    | 0.108278 | 0.219514 | 0.664814 | 0.672789 | 0.653998 |
| <b>PRPS1</b>   | 0.245115 | 0.126676 | 0.019419 | 0.128065 | 0.018916 |
| <b>PRPS1L1</b> | 0.606445 | 0.046384 | 0.011521 | 0.331536 | 0.339268 |
| <b>PRPS2</b>   | 0.831567 | 0.056076 | 0.004843 | 0.465994 | 0.305017 |
| <b>PYGL</b>    | 0.12035  | 0.182944 | 0.63261  | 0.469592 | 0.834941 |
| <b>PYGM</b>    | 0.105912 | 0.300795 | 0.072922 | 0.163273 | 0.161997 |
| <b>RBKS</b>    | 0.119577 | 0.899118 | 0.072344 | 0.913592 | 0.133126 |
| <b>RPE</b>     | 0.121207 | 0.471102 | 0.264923 | 0.753951 | 0.037438 |
| <b>RPIA</b>    | 0.300618 | 0.263414 | 0.010121 | 0.012123 | 0.000578 |
| <b>SDHA</b>    | 0.518039 | 0.053203 | 0.04001  | 0.445353 | 0.210469 |
| <b>SDHB</b>    | 0.835404 | 0.151871 | 0.250403 | 0.557484 | 0.01685  |
| <b>SDHC</b>    | 0.232507 | 0.009183 | 0.168632 | 0.033296 | 0.002187 |
| <b>SDHD</b>    | 0.415562 | 0.059517 | 0.463437 | 0.475622 | 0.011049 |

|               |          |          |          |          |          |
|---------------|----------|----------|----------|----------|----------|
| <b>SUCLA2</b> | 0.340556 | 0.193395 | 0.129939 | 0.172629 | 0.014183 |
| <b>SUCLG1</b> | 0.328695 | 0.025023 | 0.153357 | 0.198642 | 0.045376 |
| <b>SUCLG2</b> | 0.106127 | 0.465278 | 0.01718  | 0.621296 | 0.237038 |
| <b>TALDO1</b> | 0.61781  | 0.043175 | 0.123504 | 0.065059 | 0.003374 |
| <b>TKT</b>    | 0.152685 | 0.541674 | 0.001309 | 0.020472 | 0.010954 |
| <b>TPI1</b>   | 0.304767 | 0.060271 | 0.187325 | 0.004987 | 0.014742 |
| <b>UGP2</b>   | 0.140358 | 0.583771 | 0.349007 | 0.009063 | 0.00436  |
