# Supplementary material for: Energy Metabolism in Human Pluripotent Stem Cells and Their Differentiated Counterparts
Source: PubMed Central journal article supplement (PMC3117868; doi:10.1371/journal.pone.0020914), 2011-06-17
Supplement: pone.0020914.s003.pdf [file pone.0020914.s003.pdf]

| AVG Ct |       |        |            |       |        |       |
|--------|-------|--------|------------|-------|--------|-------|
| GENES  | WA01  | AE iPS | IMR-90 iPS | H7TF  | IMR-90 | WA07  |
| ACLY   | 20.68 | 20.37  | 21.19      | 22.38 | 22.74  | 21.62 |
| ACO1   | 23.17 | 23.06  | 24.08      | 23.88 | 22.12  | 22.93 |
| ACO2   | 23.45 | 23.04  | 23         | 23.1  | 24.15  | 23.22 |
| AGL    | 23.83 | 24.28  | 24.82      | 25.7  | 25.94  | 23.71 |
| ALDOA  | 19.31 | 18.79  | 19.37      | 19.37 | 18.35  | 19.47 |
| ALDOB  | 30    | 30     | 30         | 30    | 30     | 30    |
| ALDOC  | 24.26 | 23.63  | 24.13      | 28.1  | 25.08  | 25.22 |
| BPGM   | 23.51 | 23.53  | 23.9       | 22.74 | 23.13  | 23.54 |
| CS     | 20.96 | 21.07  | 21.66      | 21.56 | 22.4   | 20.98 |
| DLAT   | 21.73 | 21.69  | 22.56      | 23.56 | 24.35  | 21.85 |
| DLD    | 25.68 | 26.16  | 26.64      | 26.24 | 27.34  | 25.65 |
| DLST   | 22.62 | 22.38  | 23.08      | 23.05 | 23.99  | 22.56 |
| ENO1   | 17.98 | 20.79  | 19.01      | 19.29 | 19.19  | 18.2  |
| ENO2   | 23.54 | 23.28  | 23.3       | 24.09 | 22.77  | 22.73 |
| ENO3   | 24.58 | 25.3   | 25.22      | 27.32 | 27.3   | 24.78 |
| FBP1   | 25.91 | 26.32  | 25.51      | 29.94 | 30     | 26.87 |
| FBP2   | 25.22 | 27.38  | 28.23      | 25.69 | 30     | 25.51 |
| FH     | 21.26 | 21.18  | 21.68      | 21.38 | 22.58  | 21.68 |
| G6PC   | 30    | 30     | 30         | 30    | 30     | 30    |
| G6PC3  | 23.76 | 24.06  | 24.62      | 25.43 | 26.11  | 24.85 |
| G6PD   | 25.93 | 25.35  | 26.14      | 25.42 | 24.87  | 26.09 |
| GALM   | 25.56 | 25.16  | 26.04      | 25.49 | 26.3   | 25.32 |
| GBE1   | 23.45 | 23.7   | 24.32      | 21.73 | 20.86  | 23.67 |
| GCK    | 30    | 30     | 30         | 30    | 30     | 30    |
| GPI    | 20.61 | 20.79  | 21.21      | 21.51 | 21.3   | 20.7  |
| GSK3A  | 24.25 | 23.72  | 24.73      | 25.21 | 25.57  | 24.59 |
| GSK3B  | 22.29 | 22.29  | 22.55      | 22.72 | 23.17  | 22.42 |
| GYS1   | 23.88 | 23.8   | 23.83      | 24.01 | 22.92  | 23.97 |
| GYS2   | 30    | 30     | 30         | 30    | 30     | 30    |
| H6PD   | 27.43 | 26.44  | 25.78      | 24.58 | 24.47  | 27.15 |
| HK2    | 25.2  | 25.33  | 25.53      | 27.87 | 26.4   | 26.34 |
| HK3    | 30    | 30     | 30         | 30    | 30     | 30    |
| IDH1   | 19.58 | 19.95  | 21.6       | 23.04 | 24.17  | 20.07 |
| IDH2   | 23.13 | 23.21  | 23.48      | 23.87 | 23.73  | 23.58 |
| IDH3A  | 23.04 | 22.84  | 23.36      | 22.58 | 23.51  | 22.66 |
| IDH3B  | 21.91 | 21.75  | 22.43      | 22.89 | 24.22  | 22.15 |
| IDH3G  | 23.44 | 23.25  | 23.66      | 23.38 | 23.78  | 23.76 |
| MDH1   | 19.31 | 19.34  | 20.12      | 20.8  | 21.97  | 19.91 |

|                |       |       |       |       |       |       |
|----------------|-------|-------|-------|-------|-------|-------|
| <b>MDH1B</b>   | 26.41 | 26.79 | 27.01 | 29.02 | 30    | 27.01 |
| <b>MDH2</b>    | 20.01 | 19.68 | 20.02 | 20.19 | 20.67 | 19.89 |
| <b>OGDH</b>    | 23.31 | 22.91 | 23.49 | 23.76 | 24.54 | 23.49 |
| <b>PC</b>      | 25.16 | 25.22 | 25.72 | 26.85 | 25.39 | 26.56 |
| <b>PCK1</b>    | 30    | 30    | 30    | 30    | 30    | 30    |
| <b>PCK2</b>    | 22    | 22.25 | 22.61 | 24.95 | 24.38 | 23.01 |
| <b>PDHA1</b>   | 21.59 | 21.61 | 22.09 | 22.36 | 23.22 | 21.46 |
| <b>PDHB</b>    | 20.85 | 20.94 | 21.39 | 21.81 | 22.5  | 20.7  |
| <b>PDK1</b>    | 24.59 | 24.85 | 23.69 | 25.67 | 23.06 | 22.36 |
| <b>PDK2</b>    | 28.48 | 27.96 | 28.56 | 27.18 | 29.32 | 27.86 |
| <b>PDK3</b>    | 22.91 | 23.56 | 22.41 | 23.68 | 25.05 | 22.36 |
| <b>PDK4</b>    | 30    | 30    | 30    | 30    | 27.9  | 29.91 |
| <b>PDP2</b>    | 24.22 | 24.53 | 25.51 | 26.7  | 27.05 | 24.58 |
| <b>PDPR</b>    | 23.85 | 23.65 | 25.12 | 26.09 | 26.02 | 24.36 |
| <b>PFKL</b>    | 23.34 | 22.73 | 23.15 | 22.7  | 22.34 | 22.81 |
| <b>PGAM2</b>   | 26.88 | 26.29 | 27.52 | 28.77 | 28.05 | 26.67 |
| <b>PGK1</b>    | 19.71 | 19.74 | 19.68 | 20.22 | 18.81 | 19.49 |
| <b>PGK2</b>    | 30    | 30    | 30    | 30    | 30    | 30    |
| <b>PGLS</b>    | 22.37 | 22.44 | 22.51 | 21.94 | 22.55 | 22.27 |
| <b>PGM1</b>    | 23.49 | 23.23 | 22.34 | 22.2  | 22.52 | 21.52 |
| <b>PGM2</b>    | 22.79 | 22.72 | 23.4  | 23.32 | 24.43 | 22.89 |
| <b>PGM3</b>    | 22.35 | 22.73 | 23.11 | 22.59 | 23.08 | 22.46 |
| <b>PHKA1</b>   | 26.53 | 26.35 | 26.56 | 26.98 | 28.01 | 25.99 |
| <b>PHKB</b>    | 22.92 | 22.86 | 23.59 | 22.81 | 23.64 | 22.78 |
| <b>PHKG1</b>   | 28.99 | 28.95 | 29.4  | 29    | 29.43 | 28.9  |
| <b>PHKG2</b>   | 26.3  | 25.81 | 27.16 | 27.83 | 27.7  | 26.69 |
| <b>PKLR</b>    | 28.62 | 30    | 30    | 30    | 30    | 29.56 |
| <b>PRPS1</b>   | 21.55 | 21.3  | 20.78 | 22    | 23.33 | 21.06 |
| <b>PRPS1L1</b> | 30    | 30    | 30    | 30    | 30    | 30    |
| <b>PRPS2</b>   | 23.5  | 22.63 | 23.18 | 23.55 | 23.88 | 23.46 |
| <b>PYGL</b>    | 24.54 | 23.62 | 23.57 | 23.8  | 23.15 | 23.19 |
| <b>PYGM</b>    | 26.63 | 26.41 | 27.29 | 30    | 30    | 27.8  |
| <b>RBKS</b>    | 25.92 | 26.22 | 26.48 | 27.15 | 28.11 | 26.69 |
| <b>RPE</b>     | 21.05 | 21.3  | 21.94 | 21.99 | 23.11 | 21.5  |
| <b>RPIA</b>    | 23.7  | 25.21 | 23.83 | 24.72 | 25.39 | 23.78 |
| <b>SDHA</b>    | 21.8  | 24.79 | 22.08 | 21.86 | 22.42 | 21.83 |
| <b>SDHB</b>    | 21.52 | 21.38 | 21.94 | 21.64 | 22.5  | 21.49 |
| <b>SDHC</b>    | 24.67 | 24.95 | 25.41 | 25.79 | 25.96 | 24.71 |
| <b>SDHD</b>    | 24.18 | 24.28 | 24.92 | 24.77 | 25.29 | 24.25 |
| <b>SUCLA2</b>  | 21.71 | 21.98 | 22.26 | 22.88 | 23.53 | 21.91 |

|               |       |       |       |       |       |       |
|---------------|-------|-------|-------|-------|-------|-------|
| <b>SUCLG1</b> | 23.38 | 23.42 | 24.26 | 23.02 | 23.89 | 23.09 |
| <b>SUCLG2</b> | 23.15 | 23.17 | 23.21 | 24.09 | 23.65 | 24.4  |
| <b>TALDO1</b> | 20.85 | 20.56 | 21.2  | 21.63 | 21.58 | 20.73 |
| <b>TKT</b>    | 19.86 | 19.48 | 19.56 | 21.53 | 21.82 | 20.14 |
| <b>TPI1</b>   | 19.43 | 19.05 | 19.82 | 20.25 | 19.08 | 19.21 |
| <b>UGP2</b>   | 18.63 | 18.69 | 19.54 | 21.4  | 22.39 | 19    |
